# Supplementary material
Source: Springer Nature journal article supplement (https://www.springermedizin.de/resource/supplementary/12885_2011_2729_MOESM5_ESM.pdf/9461788)

**A**

ChIP

IP: p53

PCR: p27kip1 (-110 bp)

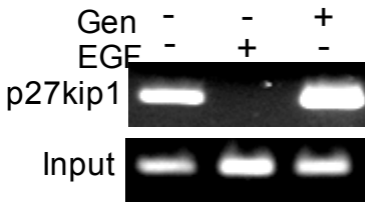**B**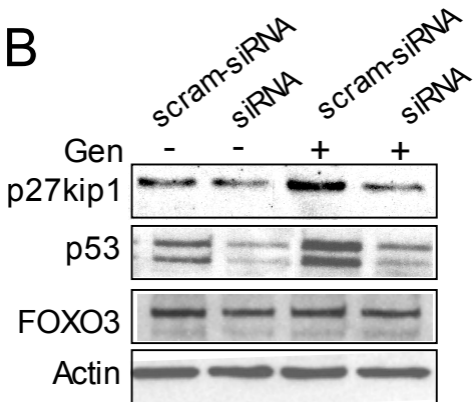

Supplement: MOESM5 [file 9461788]
